# Supplementary material for: Structure of the Cellulose Synthase Complex of Gluconacetobacter hansenii at 23.4 Å Resolution
Source: PLOS journal article supplement (doi:10.1371/journal.pone.0155886), 2016-05-23

S3 Figure

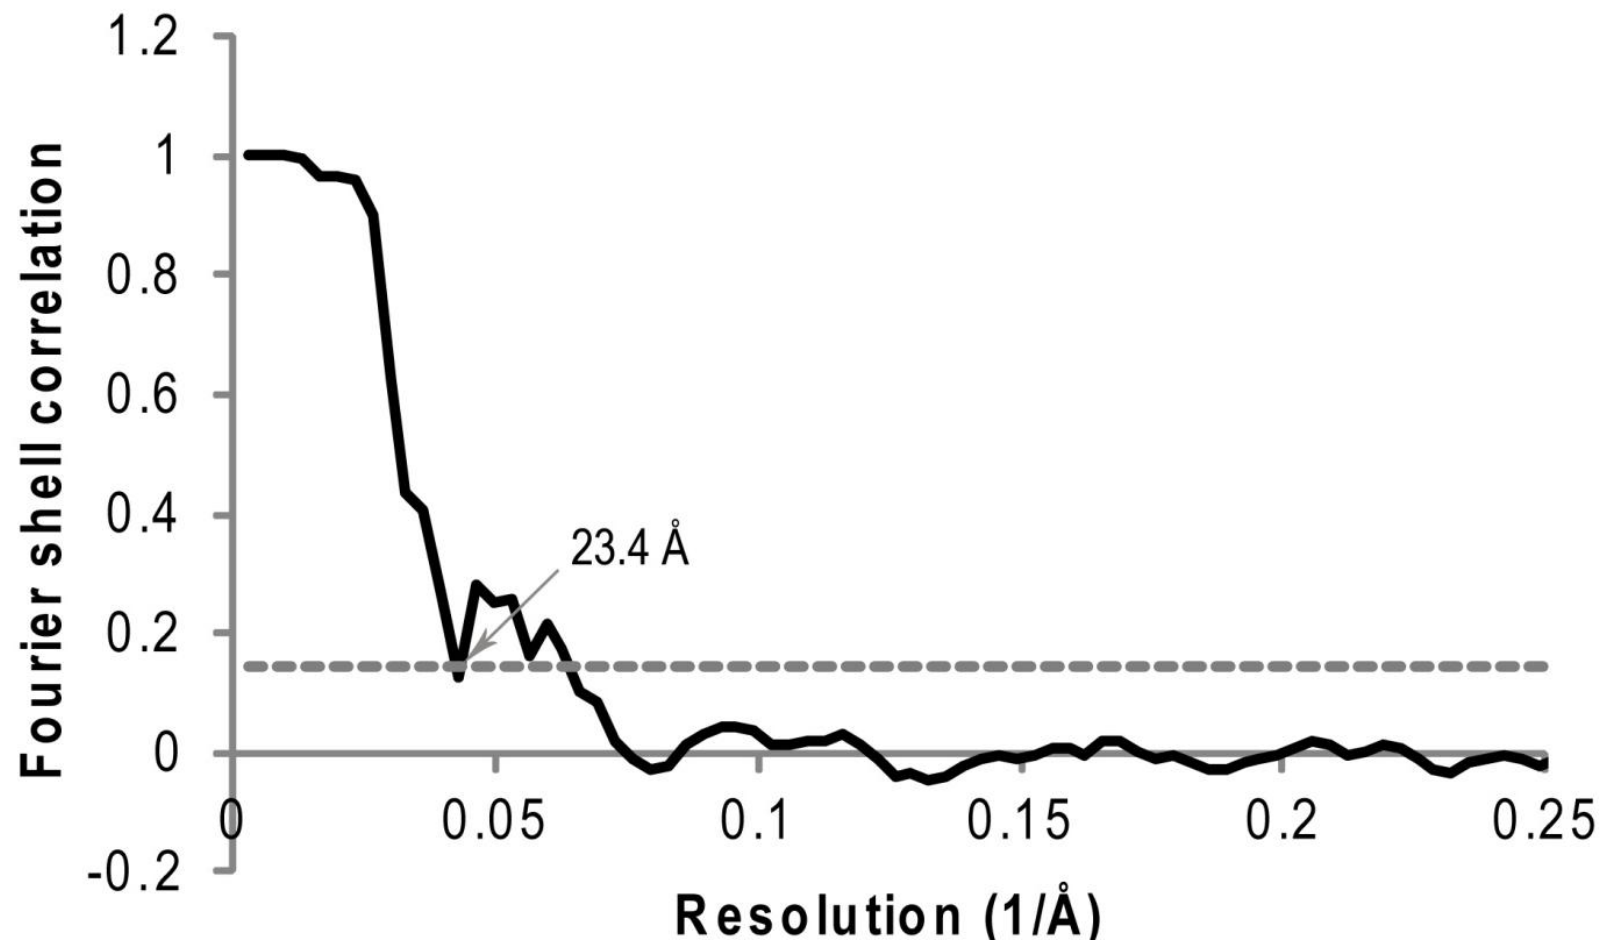

Supplement: S3 (10.1371/journal.pone.0155886.s003) [file journal.pone.0155886.s003]
